# Supplementary material for: Deoxynivalenol-3-Glucoside Content Is Highly Associated with Deoxynivalenol Levels in Two-Row Barley Genotypes of Importance to Canadian Barley Breeding Programs
Source: PubMed Central journal article supplement (PMC6628427; doi:10.3390/toxins11060319), 2019-06-05
Supplement: toxins-11-00319-s001.pdf [file toxins-11-00319-s001.pdf]

# Supplementary Materials: Deoxynivalenol-3-Glucoside Content is Highly Associated with Deoxynivalenol Levels in Two-Row Barley Genotypes of Importance to Canadian Barley Breeding Programs

James R. Tucker \*, Ana Badea, Richard Blagden, Kerri Pleskach, Sheryl A. Tittlemier and W.G. Dilantha Fernando

**Table S1-I.** Descriptive statistics of mycotoxin concentrations (mg kg<sup>-1</sup>) of mock-inoculated (water) barley plots by developmental stage at harvest and tissue type in 2016 and 2017 (*n* = 48).

| (A) Grain-Soft-dough  | Mycotoxin <sup>1</sup> | 2016 |      |      |       | 2017 |      |      |      |
|-----------------------|------------------------|------|------|------|-------|------|------|------|------|
|                       |                        | mean | se   | min  | max   | mean | se   | min  | max  |
|                       | HT2                    | 0.00 | 0.00 | 0.00 | 0.00  | 0.00 | 0.00 | 0.00 | 0.00 |
|                       | T2                     | 0.00 | 0.00 | 0.00 | 0.00  | 0.00 | 0.00 | 0.00 | 0.00 |
|                       | 15ADON                 | 0.00 | 0.00 | 0.00 | 0.12  | 0.00 | 0.00 | 0.00 | 0.00 |
|                       | DON3G                  | 0.09 | 0.02 | 0.00 | 0.53  | 0.25 | 0.05 | 0.00 | 1.72 |
|                       | NIV                    | 0.83 | 0.13 | 0.00 | 4.02  | 0.91 | 0.13 | 0.00 | 5.07 |
|                       | DON                    | 0.24 | 0.07 | 0.00 | 2.89  | 0.54 | 0.11 | 0.00 | 4.23 |
|                       | ZEA                    | 0.00 | 0.00 | 0.00 | 0.00  | 0.00 | 0.00 | 0.00 | 0.03 |
|                       | 3ADON                  | 0.01 | 0.00 | 0.00 | 0.18  | 0.05 | 0.01 | 0.00 | 0.62 |
|                       | CUL                    | -    | -    | -    | -     | 0.06 | 0.01 | 0.00 | 0.46 |
| (B) Rachis-Soft-dough | Mycotoxin              | 2016 |      |      |       | 2017 |      |      |      |
|                       |                        | mean | se   | min  | max   | mean | se   | min  | max  |
|                       | HT2                    | 0.01 | 0.01 | 0.00 | 0.26  | 0.00 | 0.00 | 0.00 | 0.00 |
|                       | T2                     | 0.00 | 0.00 | 0.00 | 0.08  | 0.00 | 0.00 | 0.00 | 0.00 |
|                       | 15ADON                 | 0.01 | 0.01 | 0.00 | 0.36  | 0.00 | 0.00 | 0.00 | 0.00 |
|                       | DON3G                  | 0.36 | 0.09 | 0.00 | 2.98  | 0.70 | 0.09 | 0.00 | 2.34 |
|                       | NIV                    | 2.54 | 0.44 | 0.00 | 15.81 | 0.95 | 0.24 | 0.00 | 7.26 |
|                       | DON                    | 0.35 | 0.09 | 0.00 | 3.10  | 0.63 | 0.20 | 0.00 | 9.37 |
|                       | ZEA                    | 0.00 | 0.00 | 0.00 | 0.00  | 0.00 | 0.00 | 0.00 | 0.00 |
|                       | 3ADON                  | 0.02 | 0.01 | 0.00 | 0.32  | 0.05 | 0.02 | 0.00 | 0.42 |
|                       | CUL                    | -    | -    | -    | -     | 0.13 | 0.02 | 0.00 | 0.61 |
| (C) Grain-Mature      | Mycotoxin              | 2016 |      |      |       | 2017 |      |      |      |
|                       |                        | mean | se   | min  | max   | mean | se   | min  | max  |
|                       | HT2                    | 0.00 | 0.00 | 0.00 | 0.06  | 0.00 | 0.00 | 0.00 | 0.00 |
|                       | T2                     | 0.00 | 0.00 | 0.00 | 0.00  | 0.00 | 0.00 | 0.00 | 0.00 |
|                       | 15ADON                 | 0.00 | 0.00 | 0.00 | 0.00  | 0.00 | 0.00 | 0.00 | 0.00 |
|                       | DON3G                  | 0.10 | 0.02 | 0.00 | 0.44  | 0.19 | 0.03 | 0.00 | 0.92 |
|                       | NIV                    | 0.25 | 0.03 | 0.00 | 1.05  | 0.28 | 0.04 | 0.00 | 1.40 |
|                       | DON                    | 0.29 | 0.04 | 0.00 | 1.46  | 0.61 | 0.07 | 0.00 | 2.27 |
|                       | ZEA                    | 0.00 | 0.00 | 0.00 | 0.10  | 0.00 | 0.00 | 0.00 | 0.00 |
|                       | 3ADON                  | 0.00 | 0.00 | 0.00 | 0.08  | 0.03 | 0.01 | 0.00 | 0.19 |
|                       | CUL                    | -    | -    | -    | -     | 0.07 | 0.01 | 0.01 | 0.30 |

<sup>1</sup> HT2 = HT2 toxin; T2 = T2 toxin; 15ADON = 15-acety-ldeoxynivalenol; DON3G = deoxynivalenol-3-glucoside; NIV = nivalenol; DON = deoxynivalenol; ZEA = zearalenone; 3ADON = 3-acetyl-deoxynivalenol; CUL = culmorin. se = standard error; min=minimum; max=maximum.

**Table S1-II.** Descriptive statistics of mycotoxin concentrations (mg kg<sup>-1</sup>) of *Fusarium*-inoculated barley plots by developmental stage at harvest and tissue type in 2016 and 2017 (*n* = 48).

| <b>(A) Grain-Soft-dough</b>  |             | <b>2016</b> |            |            |             | <b>2017</b> |            |            |  |
|------------------------------|-------------|-------------|------------|------------|-------------|-------------|------------|------------|--|
| <b>Mycotoxin<sup>1</sup></b> | <b>mean</b> | <b>se</b>   | <b>min</b> | <b>max</b> | <b>mean</b> | <b>se</b>   | <b>min</b> | <b>max</b> |  |
| HT2                          | 0.00        | 0.00        | 0.00       | 0.00       | 0.01        | 0.01        | 0.00       | 0.35       |  |
| T2                           | 0.00        | 0.00        | 0.00       | 0.00       | 0.01        | 0.01        | 0.00       | 0.31       |  |
| 15ADON                       | 0.09        | 0.02        | 0.00       | 0.83       | 0.00        | 0.00        | 0.00       | 0.00       |  |
| DON3G                        | 6.91        | 0.83        | 0.10       | 22.77      | 4.12        | 0.63        | 0.07       | 22.38      |  |
| NIV                          | 0.77        | 0.12        | 0.00       | 4.20       | 0.83        | 0.08        | 0.00       | 2.21       |  |
| DON                          | 16.09       | 1.89        | 0.11       | 57.99      | 11.59       | 1.87        | 0.15       | 62.98      |  |
| ZEA                          | 0.01        | 0.01        | 0.00       | 0.31       | 0.01        | 0.00        | 0.00       | 0.07       |  |
| 3ADON                        | 1.50        | 0.20        | 0.00       | 5.35       | 0.72        | 0.15        | 0.00       | 4.51       |  |
| CUL                          | -           | -           | -          | -          | 0.89        | 0.17        | 0.02       | 5.59       |  |
| <b>(B) Rachis-Soft-dough</b> |             | <b>2016</b> |            |            |             | <b>2017</b> |            |            |  |
| <b>Mycotoxin</b>             | <b>mean</b> | <b>se</b>   | <b>min</b> | <b>max</b> | <b>mean</b> | <b>se</b>   | <b>min</b> | <b>max</b> |  |
| HT2                          | 0.04        | 0.02        | 0.00       | 1.11       | 0.00        | 0.00        | 0.00       | 0.00       |  |
| T2                           | 0.00        | 0.00        | 0.00       | 0.04       | 0.00        | 0.00        | 0.00       | 0.00       |  |
| 15ADON                       | 0.10        | 0.02        | 0.00       | 0.54       | 0.00        | 0.00        | 0.00       | 0.00       |  |
| DON3G                        | 19.47       | 2.32        | 0.17       | 58.35      | 12.35       | 2.13        | 0.00       | 71.81      |  |
| NIV                          | 3.30        | 0.59        | 0.00       | 17.22      | 0.92        | 0.17        | 0.00       | 4.27       |  |
| DON                          | 23.92       | 2.93        | 0.11       | 101.92     | 12.93       | 2.24        | 0.33       | 63.45      |  |
| ZEA                          | 0.02        | 0.01        | 0.00       | 0.26       | 0.01        | 0.01        | 0.00       | 0.18       |  |
| 3ADON                        | 1.89        | 0.23        | 0.00       | 5.38       | 1.02        | 0.27        | 0.00       | 10.19      |  |
| CUL                          | -           | -           | -          | -          | 1.86        | 0.33        | 0.18       | 10.13      |  |
| <b>(C) Grain-Mature</b>      |             | <b>2016</b> |            |            |             | <b>2017</b> |            |            |  |
| <b>Mycotoxin</b>             | <b>mean</b> | <b>se</b>   | <b>min</b> | <b>max</b> | <b>mean</b> | <b>se</b>   | <b>min</b> | <b>max</b> |  |
| HT2                          | 0.00        | 0.00        | 0.00       | 0.00       | 0.00        | 0.00        | 0.00       | 0.11       |  |
| T2                           | 0.00        | 0.00        | 0.00       | 0.00       | 0.00        | 0.00        | 0.00       | 0.00       |  |
| 15ADON                       | 0.01        | 0.01        | 0.00       | 0.18       | 0.00        | 0.00        | 0.00       | 0.00       |  |
| DON3G                        | 4.59        | 0.43        | 1.17       | 13.10      | 3.49        | 0.55        | 0.34       | 15.51      |  |
| NIV                          | 0.24        | 0.02        | 0.06       | 1.15       | 0.30        | 0.03        | 0.00       | 1.05       |  |
| DON                          | 11.89       | 1.13        | 3.79       | 38.91      | 10.67       | 1.75        | 0.97       | 54.62      |  |
| ZEA                          | 0.03        | 0.01        | 0.00       | 0.20       | 0.02        | 0.01        | 0.00       | 0.52       |  |
| 3ADON                        | 0.74        | 0.09        | 0.21       | 3.27       | 0.43        | 0.07        | 0.00       | 2.72       |  |
| CUL                          | -           | -           | -          | -          | 0.64        | 0.10        | 0.06       | 2.74       |  |

<sup>1</sup> HT2 = HT2 toxin; T2 = T2 toxin; 15ADON = 15-acetyl-deoxynivalenol; DON3G = deoxynivalenol-3-glucoside; NIV = nivalenol; DON = deoxynivalenol; ZEA = zearalenone; 3ADON = 3-acetyl-deoxynivalenol; CUL = culmorin. se = standard error; min=minimum; max=maximum.

**Table S2.** Panel of fourteen mycotoxins and their limit of quantification for samples evaluated in 2016 and 2017 for content in barley tissues.

| <b>Abbreviation</b> | <b>Mycotoxin</b>           | <b>LOQ<sup>1</sup></b> |
|---------------------|----------------------------|------------------------|
| DON                 | deoxynivalenol             | 0.03                   |
| DON-3G              | deoxynivalenol-3-glucoside | 0.05                   |
| 15-ADON             | 15-acetyl deoxynivalenol   | 0.05                   |
| 3-ADON              | 3-acetyl deoxynivalenol    | 0.05                   |
| ZEA                 | zearalenone                | 0.02                   |
| NIV                 | nivalenol                  | 0.06                   |
| CUL <sup>2</sup>    | culmorin                   | 0.05                   |
| HT-2                | HT-2 toxin                 | 0.06                   |
| T-2                 | T-2 toxin                  | 0.03                   |
| AFG1                | aflatoxin G2               | 0.001                  |
| AFG2                | aflatoxin G1               | 0.001                  |
| AFB1                | aflatoxin B2               | 0.001                  |
| AFB2                | aflatoxin B1               | 0.001                  |
| OTA                 | ochratoxin A               | 0.0006                 |

<sup>1</sup> Limit of quantification (mg kg<sup>-1</sup>); <sup>2</sup> Only evaluated in 2017.
